# Supplementary material for: Allotetraploidization in Brachypodium May Have Led to the Dominance of One Parent’s Metabolome in Germinating Seeds
Source: Cells. 2021 Apr 7;10(4):828. doi: 10.3390/cells10040828 (PMC8067749; doi:10.3390/cells10040828)
Supplement: Supplementary file 1 [file cells-10-00828-s001.zip › cells-1146648 supplementary revised/R1-cells-1146648-supplementary table S1.xlsx]

## Sheet: embryo
Table S1. Metabolomic matrices for the Brachypodium species embryo and endosperm.
no	class	57.0344	57.9757	59.0138	59.9851	60.993	61.9883	65.0031	67.0189	68.014	71.0138	72.009	72.017	72.9931	73.0294	73.9963	74.0246	74.0327	75.0087	75.0257	76.9879	78.9188	78.959	79.9572	80.9167	80.9649	80.9747	82.0059	82.0298	82.9718	83.0139	83.0249	83.0501	84.0089	85.0294	86.0327	87.0087	87.045	88.012	88.0403	88.988	89.0244	90.0277	90.9931	91.0285	91.04	91.4947	91.9951	92.9279
1	Bd21-embryo-4h	3.14238	3.74185	5.01181	3.4609	3.54803	5.06861	0	4.72494	2.47037	5.10941	3.6299	2.97309	5.16112	5.37081	2.97355	3.5184	3.41763	5.11497	2.70379	2.89984	2.44665	5.08898	4.17845	2.93062	2.28518	3.34651	3.07665	2.95378	0	3.25449	2.60712	2.78506	3.06001	5.44846	3.68111	5.16048	3.36682	3.19626	4.78828	3.20177	6.25803	4.60524	5.89459	3.7767	5.06051	4.63335	3.6652	0
3	Bd21-embryo-12h	3.65849	3.16911	4.92861	3.53975	3.70914	4.97028	2.97328	4.79333	2.5447	5.52934	3.49998	3.6421	5.28909	5.38604	3.17139	3.89136	3.36733	5.05647	3.03957	2.77599	3.55577	5.25873	3.92925	3.50322	2.36868	3.33929	3.14724	2.54526	2.44993	3.66361	0	2.57147	2.8455	5.58854	3.89463	5.45274	3.58432	3.62685	5.17067	4.14444	5.80601	3.88749	6.01828	2.62709	5.01114	4.82675	3.7776	2.38671
4	Bd21-embryo-12h	3.56346	3.51608	5.0777	3.53239	3.66693	5.00857	2.147	4.65186	2.61121	5.42917	3.43616	3.53606	5.1562	5.3021	2.93906	3.91032	3.35118	5.14218	2.80401	2.54946	3.41407	5.2059	3.8226	3.57537	2.38148	3.24246	2.87818	2.9897	2.43333	3.30272	0	2.61976	3.09965	5.469	3.78528	5.34488	3.20546	3.42757	5.15803	4.14257	5.83557	3.96784	6.01175	3.26106	5.14052	4.77921	3.90052	0
5	Bd21-embryo-12h	3.49272	2.47518	4.9656	3.37291	3.87152	4.8722	0	4.53124	2.42667	5.06081	3.3738	3.05504	4.97224	5.3841	2.31778	3.69334	3.4101	5.10551	3.04732	3.08549	2.30243	5.21113	4.03465	0	0	3.44925	2.8517	3.4458	2.69454	3.24732	0	2.87958	3.19919	5.33616	3.60164	5.08287	3.46126	3.33674	5.18242	4.80248	6.15925	4.39078	5.86564	3.54308	4.97733	4.59781	3.67317	0
6	Bd21-embryo-12h	3.47014	2.6435	5.09134	3.47558	3.69179	4.84248	2.68703	4.69655	2.84225	5.1704	3.59773	3.10143	5.04501	5.30843	2.99199	3.84359	3.46383	5.09718	2.78687	2.33806	0	5.29751	4.32712	2.34136	0	3.39417	0	3.1583	2.29263	3.21971	0	2.26346	2.77662	5.40451	3.61909	5.31084	3.572	3.40318	5.26996	3.81273	6.17578	4.46431	5.88287	3.65236	5.05286	4.64254	3.79742	2.33779
7	Bd21-embryo-12h	3.66886	3.54089	4.94544	3.59709	3.7485	4.96716	2.83509	4.83461	2.28866	5.47673	3.42082	3.53661	5.24254	5.35577	3.22175	3.93095	3.50806	5.07505	2.96752	2.63138	3.61426	5.23983	3.93338	3.55073	0	2.40072	3.20151	2.8247	0	3.41082	2.54957	2.90233	3.10792	5.5516	3.92918	5.46441	3.51319	3.49536	5.16123	4.00298	5.90392	4.02632	6.0546	3.16012	5.11395	4.87395	4.04789	2.40847
12	Bd21-embryo-4h	3.16973	3.40556	5.06351	3.35035	3.69112	5.04447	2.79289	4.63015	2.32553	5.16813	3.65768	3.10916	5.15088	5.33424	2.99852	3.49103	3.56345	5.04818	3.32599	2.20394	0	5.20265	4.2465	2.78447	2.77806	3.5117	3.08947	2.87362	0	3.33921	2.35019	2.93826	2.9143	5.45143	3.71442	5.23133	3.40929	3.3801	4.8102	3.71465	6.20533	4.47148	5.86329	3.73649	4.95933	4.61748	3.65548	0
14	Bd21-embryo-24h	3.5791	2.94031	5.14365	3.73989	3.64151	4.78255	2.85805	4.85966	2.65728	5.2535	3.43837	3.21196	5.06028	5.27423	2.9214	3.82094	3.09844	5.10833	0	2.57668	0	5.30248	3.91572	0	0	3.18333	2.95116	2.86621	0	3.42929	2.84823	2.99365	3.05546	5.47491	3.74321	5.35909	3.2595	3.46742	4.92519	4.33809	6.03548	4.26357	6.04202	3.53444	5.12136	4.85738	3.93559	0
15	Bd21-embryo-24h	3.5336	3.6771	5.09802	3.29704	3.5935	4.96987	0	4.46852	2.51665	5.24383	3.444	3.38017	4.945	5.22352	2.86993	3.81589	3.1624	5.07979	2.38166	2.45863	3.43745	5.43625	4.32018	3.39327	2.57861	2.77066	2.84281	2.87688	0	3.20886	2.71508	2.73869	3.25453	5.3086	3.5207	5.18159	3.54303	2.83708	5.01212	3.86346	5.98441	4.24699	5.7938	3.5249	5.07388	4.46971	3.61372	3.16091
16	Bd21-embryo-24h	3.1313	3.2447	5.22182	3.37291	3.69595	5.07609	0	4.39913	2.56655	5.22403	3.3781	3.44701	4.93509	5.23593	2.45897	3.84071	3.41413	5.11552	2.68366	3.02089	3.5282	5.35063	4.1959	3.25398	2.80624	3.31514	3.04434	2.85021	2.74333	3.16565	2.59634	2.82603	3.20393	5.25084	3.46734	5.11869	3.03918	3.33371	5.02837	3.8587	5.9705	4.18399	5.71268	3.04968	5.0173	4.43118	3.54498	2.84801
17	Bd21-embryo-24h	3.48208	2.51242	5.06141	3.35686	3.69395	5.03655	2.90754	4.68136	2.76611	5.39996	3.65062	3.60867	5.06027	5.25934	3.01414	3.67775	3.41074	5.11143	3.52721	2.85151	2.67606	5.37043	4.23105	2.3089	2.29039	3.57927	3.0385	3.13161	2.58327	3.31383	0	2.14972	2.8355	5.41406	3.67369	5.41828	3.47231	3.5687	5.07625	4.3121	6.00816	4.20874	5.93311	3.39719	4.94332	4.73525	3.92118	2.23932
18	Bd21-embryo-24h	3.42265	3.01141	5.34372	3.4088	3.59702	5.03576	2.64825	4.62338	2.22664	5.36611	3.51675	3.41505	4.99834	5.28048	2.81399	3.85955	3.20882	5.17436	2.60624	2.84673	0	5.4268	4.16391	0	2.50985	3.0431	2.82934	2.62002	2.24495	3.39497	2.3982	2.29559	2.71468	5.31675	3.55865	5.2703	3.10639	3.33053	5.06575	4.39188	5.85782	4.00747	5.82859	3.42125	5.10688	4.62995	3.57421	2.50769
24	114-embryo-4h	3.47965	3.67781	4.91218	3.75713	3.56128	4.96579	2.87827	4.85884	3.06481	5.17914	3.31739	3.14618	5.20497	5.30746	3.11498	3.59444	3.4559	4.93341	2.79025	2.7762	3.09782	5.0691	3.70192	3.24161	0	2.81923	3.24925	2.61078	0	3.23406	2.95196	2.77515	3.06279	5.54974	3.83034	5.2371	3.28926	3.14133	4.83639	3.82283	5.45269	3.59395	6.03747	2.35951	4.98186	4.8426	3.82545	0
25	114-embryo-4h	3.88479	3.46992	4.99416	3.52856	3.02521	5.05293	2.71014	4.75847	2.75024	5.19391	3.47572	3.35634	4.92335	5.10387	2.56976	3.86976	3.09187	4.87791	1.63712	2.95723	3.14535	5.11601	3.51853	3.0203	2.63555	3.15299	2.97202	3.05669	2.60757	4.17814	2.77953	3.43193	2.96736	5.32719	3.63836	5.02347	3.72607	3.19021	4.61812	3.35297	5.40881	3.52684	5.88173	0	4.84717	4.68175	3.68033	3.06567
26	114-embryo-4h	3.58996	2.75646	4.81065	3.57607	3.51732	5.29454	2.69332	4.82527	0	5.23675	3.40681	3.33747	5.31198	5.39417	3.40559	3.6594	3.50106	4.9654	2.7481	2.80069	3.30105	5.08989	3.69691	2.80918	2.36663	3.21665	3.20447	2.69086	0	3.52269	0	2.81936	2.74039	5.65789	3.99018	5.39267	3.40214	3.56375	4.78824	3.70944	5.48661	3.57903	6.02348	0	5.0119	4.86353	3.8833	2.33441
27	114-embryo-4h	3.61666	3.14627	4.9367	3.49108	3.47584	5.04671	2.96807	4.89944	0	5.24259	2.67633	3.38365	5.30125	5.31953	2.94352	3.43109	3.43399	4.87129	2.89301	3.04735	2.69387	5.19558	3.49921	2.40068	2.44896	3.11163	3.19183	2.76516	2.66102	3.2811	2.71688	2.94338	3.02204	5.62048	3.89281	5.20122	3.09375	3.32415	4.52178	3.59187	5.53774	3.7444	6.02238	0	4.93826	4.79435	3.95372	0
28	114-embryo-4h	3.37956	3.26066	4.9488	3.64272	3.5471	5.00281	2.74852	4.85166	0	5.23695	2.68518	3.30056	5.23354	5.27917	2.99494	3.33802	3.30148	4.86968	2.81448	2.75046	2.98089	5.12279	3.65269	2.77052	0	3.23285	3.17681	2.24807	0	3.2252	2.65204	3.09076	2.75957	5.54298	3.87635	5.11881	0	3.2071	4.6536	3.34047	5.28472	3.32079	6.05436	2.46686	5.06041	4.8785	4.0355	0
33	Bd21-embryo-4h	3.52107	3.01492	4.95295	3.67471	3.69406	4.90009	2.73318	4.88579	2.53365	5.39497	3.24726	3.51376	5.3838	5.44842	3.33306	3.76358	3.5526	5.06489	3.05876	2.65342	3.24548	5.15005	3.72563	3.38262	2.25664	3.00938	3.06701	2.92225	0	3.40841	2.36965	2.29264	2.88807	5.6516	3.94456	5.27944	2.90137	3.47882	4.76226	4.10872	5.94421	4.16605	6.03012	3.43615	5.08153	4.82992	3.90665	0
35	114-embryo-12h	2.82085	3.77653	5.13626	3.65311	3.40768	5.04259	2.74607	4.42723	2.81196	4.96064	3.00352	2.95514	4.69687	4.87264	1.9809	3.38999	2.6387	4.96122	2.88548	3.06728	3.02428	4.70597	3.41407	3.12081	2.35363	3.38587	2.83753	2.76109	2.85781	3.04771	2.65326	2.39151	3.31295	4.91579	3.23894	4.82292	2.99409	3.02027	4.54345	3.31204	5.58202	3.80811	5.77394	2.96422	2.87033	4.48671	3.68359	3.47306
36	114-embryo-12h	3.15155	3.58456	5.15415	3.45951	3.57237	4.87875	2.61412	4.57985	2.75959	5.05966	2.92782	3.13747	4.89861	5.01536	2.20473	3.55936	3.38381	4.95086	2.73921	2.84582	2.79384	4.94142	3.42438	2.86463	0	3.48	2.74228	3.14874	2.39124	3.26523	2.75249	0	3.27549	5.17473	3.38444	4.97691	3.52618	3.09171	4.61483	3.62391	5.60349	3.81107	5.82355	2.27043	2.78353	4.5968	3.66427	3.13144
37	114-embryo-12h	3.42521	2.85963	4.85245	3.58923	3.39523	5.61131	2.64806	4.67308	2.6124	5.21739	3.13225	3.21329	5.11866	5.12634	2.7511	3.66751	3.17094	4.99891	3.13515	2.65854	3.10492	5.14731	3.35156	2.48055	0	3.43693	3.03989	2.94998	0	3.37337	0	0	3.03047	5.48489	3.74238	5.29098	3.43146	3.44467	4.57365	3.662	5.70468	3.90366	6.05706	2.91184	2.90167	4.82819	3.95619	3.23634
38	114-embryo-12h	3.20736	3.63092	5.2209	3.79428	3.66925	5.08037	3.04149	4.991	2.15019	5.40098	3.02915	3.40407	5.13511	5.25762	2.99693	3.71971	3.29922	5.21563	3.33882	2.91767	3.01929	5.167	3.92501	3.00171	2.5276	3.43002	3.30708	2.87194	0	3.60086	2.57312	2.13818	3.07762	5.35673	3.52426	5.20012	3.27188	3.38542	4.97638	4.06415	5.69025	3.80741	6.21948	2.90815	3.55375	5.04083	4.05143	2.93741
39	114-embryo-12h	3.34906	3.02798	5.11097	3.51459	3.27747	4.86423	2.72199	4.80204	2.97834	5.2354	3.3577	3.29609	5.0473	5.15796	2.7651	3.53505	3.24669	5.0575	3.0969	2.7869	2.8315	4.98537	3.62613	3.08226	0	3.50032	3.03838	3.04881	2.87346	3.43117	2.38156	0	3.44239	5.36118	3.5965	5.14369	3.25862	3.22294	4.847	3.88002	5.50514	3.66803	6.00006	2.72711	3.28195	4.81128	3.95626	3.16267
44	Bd21-embryo-4h	3.60554	2.99523	5.13238	3.65324	3.71955	5.00151	2.90139	4.87164	0	5.45225	3.681	3.45609	5.40964	5.51756	3.2366	3.86785	3.58641	5.13697	3.25129	2.75738	3.42788	5.10465	3.79427	3.40158	0	2.80411	2.95628	2.87291	0	3.46948	0	2.51313	2.45357	5.6729	3.82308	5.28307	3.36172	3.43727	4.95809	4.1731	5.9208	4.06956	6.04789	3.29256	5.04611	4.81486	3.85463	0
46	114-embryo-24h	3.19349	2.93243	4.70643	3.29968	3.14208	5.09818	0	3.77737	2.81888	5.20034	2.7423	3.26928	4.66733	4.8965	2.40194	3.39132	2.91196	4.92989	2.84332	2.74601	3.38329	4.87155	2.98866	3.32958	0	3.12963	0	2.93114	2.70945	3.05812	2.70817	2.44173	3.07408	4.87063	3.1157	4.99583	3.01764	3.1154	4.34846	3.59187	5.62565	3.77622	5.32999	3.02931	2.48562	4.04385	3.12422	4.14734
47	114-embryo-24h	3.61303	3.50047	5.15217	3.62775	3.90846	4.90422	2.79338	4.59158	2.90625	5.54923	2.83565	3.63464	5.00006	5.14901	2.75784	3.75878	3.11681	5.2211	3.04928	3.30506	3.27344	5.29877	3.69049	3.30191	1.76532	3.4261	2.66132	3.50188	2.8854	3.79737	2.56354	2.42639	3.27989	5.2147	3.44428	5.2778	3.59278	3.39405	4.71324	4.70537	5.83191	3.9945	5.84956	3.21306	2.69393	4.64908	3.64728	3.30862
48	114-embryo-24h	3.58255	3.57428	5.27022	3.5774	3.98006	4.75069	2.17946	4.68352	2.90618	5.69779	2.62623	3.8159	5.20926	5.32185	3.06492	3.62796	3.36144	5.3294	0	2.8964	3.38113	5.24934	3.8127	3.33446	2.58899	3.2971	2.80826	2.66484	2.33515	3.67166	2.82237	2.69452	3.25329	5.35381	3.66024	5.40496	3.48875	3.41529	4.78552	4.79737	5.86383	4.05502	5.85246	3.19287	2.75214	4.61986	3.74112	2.43676
49	114-embryo-24h	3.34732	3.57778	5.25368	3.61613	3.98249	4.59846	2.49646	4.58532	3.00032	5.70301	3.29051	3.81524	5.21109	5.28821	3.06558	3.83097	3.50674	5.33475	3.29736	3.03926	3.32186	5.44249	3.90939	3.52407	0	3.48524	2.83398	3.16548	2.85893	3.41798	2.95417	0	3.23852	5.26066	3.60197	5.31755	3.36751	3.56364	4.89333	4.83905	5.78465	3.96152	5.93384	3.09702	3.09456	4.72233	3.83477	2.94805
50	114-embryo-24h	3.43725	2.74514	5.17158	3.51999	4.23815	4.46701	2.20152	4.54478	2.90326	5.68223	3.27649	3.7672	5.21236	5.26199	2.91796	3.88941	3.37608	5.36392	3.07731	3.06942	3.36291	5.36867	3.9878	2.92853	2.58761	3.14657	3.19756	2.91864	0	3.43223	2.86729	2.42371	2.82026	5.25639	3.54995	5.32375	3.69487	3.46625	4.95781	5.04664	5.68775	3.73511	5.92636	0	3.25795	4.56912	3.90579	0
57	113-embryo-4h	2.46762	3.59902	4.69029	3.45099	3.14969	5.11893	2.36439	3.8649	2.79403	4.72665	3.0951	2.88913	4.58491	4.81765	2.56107	3.432	2.88177	4.80696	2.79609	3.16771	2.66184	4.42571	2.78641	2.97629	0	3.27912	2.2875	2.8597	2.69308	2.8348	2.92663	2.24561	3.30111	4.83584	3.07856	4.93135	3.19512	3.05035	4.14276	2.28225	5.59023	3.77602	5.30012	2.96901	2.55797	4.03415	3.19192	3.81747
58	113-embryo-4h	3.30387	1.97995	4.87464	3.70026	3.73433	5.13487	3.17597	4.83285	2.2396	5.2929	3.44678	3.30829	5.23933	5.34275	3.03526	3.86033	3.5319	5.06295	3.60345	2.59567	2.66778	5.11355	3.83363	2.67981	0	2.39173	3.40276	2.1913	2.46189	3.42095	1.97153	0	2.97497	5.54072	3.74034	5.40332	3.69758	3.52619	4.9347	3.34236	5.91802	4.14232	6.11731	3.40562	3.14041	4.93947	4.05812	0
59	113-embryo-4h	3.44551	3.6103	5.14118	3.60804	3.93877	5.07614	3.00747	4.77842	2.54933	5.28475	3.36027	3.42879	5.3564	5.47659	3.24691	3.69527	3.50263	5.21163	3.32025	2.95766	3.11375	5.24616	4.16936	3.15385	0	3.28651	3.22674	2.80676	0	3.61935	2.46053	2.32963	2.85433	5.6376	3.89668	5.20509	3.51959	3.22536	4.84737	3.9143	5.46171	3.55075	6.04902	2.48943	3.58368	4.803	3.79562	2.59198
60	113-embryo-4h	3.49151	2.35771	4.81324	3.67939	4.05496	4.96357	2.77375	4.7796	2.90461	5.30481	3.24913	3.39998	5.39075	5.46531	3.46491	3.79742	3.6749	5.19943	3.37395	2.98527	3.17972	5.10643	4.19952	3.32425	2.28208	2.86196	3.18751	0	0	3.56154	2.27199	0	3.06749	5.67876	3.95818	5.20503	2.7314	3.27842	4.89596	3.81297	5.32896	3.58878	6.10259	0	3.4278	4.88803	3.93047	2.29613
67	113-embryo-12h	3.24359	2.63421	5.10152	3.71547	3.64307	5.13665	3.04795	4.66492	2.9911	5.23256	2.9601	3.28761	4.96247	5.12422	2.2089	3.55628	3.37549	5.10305	3.0033	3.10046	3.28254	5.06475	3.98683	3.19451	0	3.40772	2.83275	2.87981	2.69177	3.45279	2.70256	2.34026	3.29732	5.26509	3.52127	5.01578	3.07073	3.22432	4.80238	3.76161	5.69902	3.85314	5.9836	2.98113	3.5072	4.76835	3.86386	3.63021
68	113-embryo-12h	3.64626	3.22971	5.01779	3.60176	3.63126	5.01684	2.69587	4.69703	2.67682	5.34225	3.20423	3.50074	5.11033	5.22644	2.9114	3.5804	3.36524	5.14033	3.18932	2.90869	3.13758	5.16104	4.2602	3.27308	2.35762	3.3139	3.1535	2.76613	2.78136	3.56537	2.75133	2.87797	2.89091	5.49537	3.75382	5.28815	3.31184	3.40903	4.96855	3.88493	5.65628	3.76689	5.93417	2.81041	3.6518	4.66093	3.72819	3.39925
69	113-embryo-12h	3.41643	4.28331	4.93564	3.59305	3.68344	4.96607	2.92486	4.55691	2.20534	5.26513	3.33083	3.31446	4.99698	5.12233	2.83187	3.70363	3.18091	5.09134	3.19442	2.59624	3.16656	5.1136	4.28975	3.13776	2.69446	3.85044	3.2141	2.83333	2.64623	3.40672	2.17909	2.40653	2.67002	5.33784	3.48374	5.15506	2.26098	3.36765	4.95695	3.65948	5.52813	3.64034	5.97136	2.70721	3.63755	4.72365	3.51819	2.87304
70	113-embryo-12h	3.54689	3.00953	5.12943	3.65654	3.74217	4.86554	2.8423	4.6865	2.71762	5.38383	3.33185	3.47055	5.12533	5.28339	2.73767	3.80511	3.18307	5.14773	3.53881	2.91881	3.38415	5.19832	4.25413	3.30399	2.33665	3.07766	3.20552	2.34713	2.309	3.49902	0	2.87044	3.14698	5.46923	3.69814	5.30887	2.56903	3.47251	5.05208	3.93913	5.59557	3.60942	6.05238	2.85192	3.42891	4.84115	3.92362	3.02215
71	113-embryo-12h	3.43752	0	5.32183	3.6008	3.82251	4.84919	1.60189	4.64076	0	5.3825	3.37635	3.45731	5.09735	5.28938	2.75595	3.806	3.44192	5.22191	3.66925	3.02288	3.27473	5.22808	4.41425	3.21643	2.58934	3.13672	2.94776	2.79964	0	3.53372	2.74288	2.79108	3.11473	5.41272	3.73284	5.27264	2.38007	3.10264	5.0106	4.05753	5.57837	3.80556	6.008	1.87759	3.16069	4.85465	3.80894	2.57588
78	113-embryo-24h	3.5269	2.29421	5.1358	3.54072	3.96168	4.59283	2.63721	4.55361	2.64333	5.62131	3.67855	3.69599	5.05934	5.52701	3.09687	4.42777	3.73955	5.3128	2.94767	3.13622	3.09142	5.63099	4.09075	3.16739	3.00002	3.02523	3.02945	4.07139	0	3.88205	2.63105	2.66825	3.09408	5.22467	3.46863	5.29654	3.34891	3.28196	5.2726	4.76778	6.3887	4.75206	5.80295	3.72464	3.57418	4.54011	3.4895	3.11444
79	113-embryo-24h	3.67713	0	5.25708	3.35506	4.1461	4.00413	0	4.57148	2.54919	5.74168	3.35689	3.85758	5.23238	5.50515	3.16745	3.93893	3.62806	5.35395	2.64274	2.60908	2.97579	5.31212	4.07661	2.94752	0	3.07038	0	2.81708	0	3.53227	2.91291	0	3.01647	5.41851	3.69874	5.48333	3.68467	3.6195	5.2991	4.94387	6.43562	4.75634	5.77776	3.90606	3.48013	4.55181	3.34227	2.41912
80	113-embryo-24h	3.49292	3.65333	5.22904	3.5782	3.98579	4.38174	0	4.41608	2.69412	5.67169	3.41977	3.8078	5.19287	5.35724	2.49231	4.0132	3.42184	5.39764	2.75198	2.73475	2.98795	5.37149	4.14576	3.29314	2.39332	3.22956	3.11653	2.93831	2.84551	3.60704	2.60904	0	3.19459	5.31659	3.51786	5.37712	3.40361	3.39608	5.11635	4.83535	6.1608	4.37804	5.90275	3.60282	3.88095	4.63462	3.76621	3.08794
81	113-embryo-24h	3.55945	0	5.16206	3.54077	4.20558	4.25916	2.83494	4.65257	2.45196	5.65651	3.61045	3.87259	5.12722	5.29909	3.00754	4.26662	3.30765	5.42043	3.35826	3.40231	2.70552	5.53998	4.17306	3.08297	2.7224	3.13879	2.98038	4.02137	0	3.87917	0	2.81669	3.32336	5.24813	3.55035	5.30781	2.90242	3.45774	5.09997	4.89469	5.9979	4.17948	5.99374	3.08916	3.19464	4.72347	3.7172	2.87231
82	113-embryo-24h	3.53984	2.73713	5.14495	3.66874	4.06109	4.61826	2.56298	4.46015	2.90571	5.65319	3.3139	3.80358	5.13721	5.2124	2.99007	3.85767	3.3109	5.33706	3.03022	3.16333	3.15568	5.29043	4.17136	3.23349	0	3.11239	3.13275	3.11774	2.83071	3.47025	3.02129	2.63889	3.52848	5.27803	3.56281	5.38117	3.42267	3.57985	5.00761	4.732	6.05297	4.19985	5.96669	3.5328	3.62384	4.71827	3.73007	3.09015
Bd21 - B. distachyon (Bd)
114 - B. stacei (Bs)
113 - B. hybridum (BdBs)
[truncated: 2,318 more columns]

## Sheet: endosperm
Table S1. Metabolomic matrices for the Brachypodium species embryo and endosperm.
no	class	57.0344	57.9757	59.0138	59.9851	60.993	61.9883	65.0031	67.0189	68.014	71.0138	72.009	72.017	72.9931	73.0294	73.9963	74.0246	74.0327	75.0087	75.0257	76.9879	78.9188	78.959	79.9572	80.9167	80.9649	80.9747	82.0059	82.0298	82.9718	83.0139	83.0249	83.0501	84.0089	85.0294	86.0327	87.0087	87.045	88.012	88.0403	88.988	89.0244	90.0277	90.9931	91.0285	91.04	91.4947	91.9951	92.9279
2	Bd21-endosp-4h	2.94879	1.72968	4.63979	3.37033	2.9394	5.65882	0	2.56955	2.59505	4.70017	3.30491	2.92075	4.2783	4.33106	1.86457	3.18008	2.20417	4.90519	2.34473	3.15867	3.02427	5.39571	3.34689	3.02671	2.71882	3.48872	0	2.73123	2.74808	2.91937	2.7754	3.07463	3.17405	4.70023	3.00112	4.74655	3.33019	2.95189	4.09806	2.75752	5.15088	3.29333	3.48548	2.37831	4.29824	2.03986	0	4.25122
8	Bd21-endosp-12h	2.83329	2.20757	4.39842	2.83006	2.68961	5.3633	0	2.53813	2.71045	4.32488	2.91371	1.80558	3.77494	4.18119	1.81235	3.13447	0	4.88771	2.04356	2.65469	3.49341	5.36146	2.87284	3.57081	2.50795	3.37682	0	2.93609	2.8881	2.80342	2.13105	3.00605	3.16405	4.31777	2.45329	4.67323	3.19378	2.76254	3.91358	2.55824	5.26431	3.40956	2.36475	2.56292	3.82211	1.98489	0	4.68272
9	Bd21-endosp-12h	2.83318	2.20826	4.50031	3.26124	2.89848	5.31438	0	0	2.81043	3.70949	2.55967	2.07313	3.62776	3.76585	0	2.81283	0	4.70726	0	3.40449	2.97643	4.39453	2.72749	2.67694	0	3.65355	0	2.67953	3.17186	2.75743	2.87481	2.84564	3.47043	3.63822	1.93553	4.09875	3.05291	2.62177	3.32151	0	5.0766	3.31119	1.97696	0	3.98789	0	0	4.89272
10	Bd21-endosp-12h	2.68565	3.17201	4.30865	3.14351	2.61733	5.3323	0	1.75805	2.70229	3.7016	2.24424	0	3.5568	3.86315	0	2.728	1.69251	4.72169	0	2.98511	3.24044	4.59487	2.70734	3.28806	0	3.51639	0	2.19866	2.91671	2.6185	0	2.82002	2.97913	3.83308	1.79437	4.48217	3.39921	2.43796	3.36868	2.13142	4.95506	3.01844	0	0	3.65766	0	0	4.99089
11	Bd21-endosp-12h	2.30572	2.82817	4.10424	3.01859	2.4237	5.30466	0	0	2.83801	3.58853	2.18805	0	3.49649	3.71549	0	2.72072	2.00091	4.74542	1.82703	3.13341	3.15704	4.15818	2.67072	3.18591	0	3.41079	0	2.37813	3.03553	2.6198	2.59477	3.10488	3.15307	3.72112	0	4.44884	3.31926	1.83498	3.31118	0	5.1047	3.24444	1.91785	1.96166	3.46294	0	0	5.10902
13	Bd21-endosp-12h	3.28254	3.16732	4.80272	2.91168	2.9987	5.07364	0	2.25636	2.63526	3.8438	2.02907	1.77388	3.67588	4.32499	0	2.94115	2.5022	4.84765	2.67048	2.49128	3.38063	5.47647	3.4605	3.42518	2.82888	3.35134	0	2.50661	2.58372	2.80184	0	3.39826	3.11442	4.13765	2.37289	4.47493	4.05173	2.63486	3.46574	3.50016	4.95836	3.0383	3.42986	2.27769	4.30311	2.0028	0	4.98816
19	Bd21-endosp-24h	2.97083	2.80909	4.75891	2.40852	2.50008	5.32359	0	2.33953	2.69337	4.31554	2.77312	1.8174	3.66204	4.25881	0	2.80915	2.67284	4.93219	0	2.36616	3.29248	5.24969	3.12353	3.2591	2.29256	3.50353	0	2.90367	3.04096	2.92893	1.98673	3.12972	3.25462	4.28751	2.25478	4.54794	3.27504	2.49717	3.76063	2.4653	5.20247	3.35827	2.0392	2.23008	3.83137	0	0	4.61892
20	Bd21-endosp-24h	2.8729	2.29264	4.73311	2.833	2.55338	5.18626	0	0	2.7464	4.09582	2.69696	0	3.78275	4.29137	2.2637	2.9283	0	4.90912	1.92755	2.82845	3.17245	5.27306	2.90682	3.23566	2.3893	3.49963	0	2.45027	2.9008	3.07645	2.92212	2.98898	3.1837	4.28899	2.3699	4.60446	3.14729	2.7893	3.71207	2.87058	5.3077	3.428	2.06568	2.69761	3.75119	0	0	4.57529
21	Bd21-endosp-24h	2.94316	3.11191	4.67924	2.84339	2.43523	5.32806	0	0	2.71688	4.28316	2.2884	1.72978	3.69609	4.32117	0	2.93461	2.46716	4.87207	2.45872	2.841	3.29188	5.2374	3.1582	3.25347	2.40067	3.52738	0	2.8491	2.64822	2.88601	2.66446	3.26319	3.07698	4.26328	2.47677	4.65439	3.38161	2.82151	3.76904	2.28788	5.21332	3.37201	2.10542	0	3.72717	0	0	4.67065
22	Bd21-endosp-24h	2.95944	3.0763	4.87231	3.07764	3.04656	5.24062	0	1.78035	2.90108	3.97745	2.65689	2.27014	3.63139	4.30269	1.76662	3.04761	1.93293	4.82932	0	3.08303	3.21349	5.01135	2.6751	3.22009	2.5703	3.43368	0	2.77242	3.00297	2.8195	3.08612	3.01675	3.47179	4.09649	2.29198	4.38525	3.00693	2.22571	3.77257	2.49799	5.18248	3.30312	2.38361	2.40132	4.18558	0	0	4.61626
23	Bd21-endosp-24h	2.91789	1.93563	4.51372	2.79624	2.26844	5.28121	0	1.8079	2.50386	3.86958	2.43653	2.16688	3.5087	4.14993	0	3.06921	2.47149	4.66088	2.17249	2.4726	2.96185	4.88516	2.68687	3.03775	2.22391	3.09783	0	2.13888	2.66924	2.90399	0	3.07271	3.07176	4.03422	2.45792	4.3861	3.36984	2.14519	3.76156	1.8229	5.03694	3.18937	2.05307	2.00796	3.66731	0	0	4.76245
29	114-endosp-4h	2.4422	2.43524	4.03701	3.37392	2.56295	5.10905	0	2.05143	2.82486	4.0538	0	0	3.91874	3.75389	0	0	0	4.6208	0	3.35083	1.91912	4.32	2.38246	0	0	3.90079	0	2.41487	3.25861	2.56074	2.92738	2.79766	3.22835	3.73508	0	4.07088	0	0	3.08131	0	4.92556	3.20154	0	0	3.80935	0	0	4.79838
30	114-endosp-4h	2.67815	2.91696	4.33843	3.17622	2.65094	5.24375	0	0	2.59531	4.56145	2.46792	2.52081	4.2086	4.04421	0	2.82601	2.30003	4.76596	2.20373	3.29552	3.17199	5.2965	2.27831	3.21813	2.30181	3.68851	0	2.29272	3.17	2.82387	2.77214	2.88186	3.30682	4.32403	2.13387	4.53276	3.04649	2.2994	3.46145	2.33857	5.07955	3.12152	0	1.81059	3.98571	0	0	4.82086
31	114-endosp-4h	2.93531	2.17291	4.69417	2.82463	3.52131	5.15703	0	3.38287	2.74091	5.30641	2.2667	3.50713	5.00257	4.75363	2.93936	3.22638	2.0932	5.14286	3.50821	0	3.83641	5.96142	3.88007	3.81094	3.46804	3.07354	0	2.44395	2.05778	3.35006	2.68146	2.74316	3.19354	5.11307	3.35215	4.93269	2.43678	2.81593	4.06284	3.45717	5.30826	3.469	3.98032	0	2.87927	2.83267	2.0967	3.99622
32	114-endosp-4h	2.33081	2.40651	4.55802	3.19087	3.4231	5.07055	0	2.8218	2.7502	4.88802	2.2972	2.79818	4.58246	4.36905	1.27455	3.08419	2.39694	4.90996	2.4377	3.09718	3.75667	5.54621	3.34391	3.73635	2.45459	3.27092	0	2.18863	2.75321	2.95807	2.86237	2.01938	2.92091	4.68776	2.96921	4.56524	3.16656	2.21852	3.77792	2.92363	5.09654	3.19183	3.81564	0	2.51203	2.22935	0	4.23709
34	114-endosp-4h	2.71794	2.51018	4.7448	3.2114	3.55162	5.20817	0	2.87916	2.75811	4.9764	2.33751	2.94483	4.6594	4.51564	2.19821	3.08141	2.67672	5.05182	3.14308	2.63847	3.65233	5.67155	3.33724	3.69412	2.90954	3.2992	0	2.68627	2.80267	3.06976	2.38219	2.58527	3.18271	4.77736	3.00634	4.7826	3.52715	2.73873	3.84123	3.04415	5.17557	3.24364	3.74822	0	2.61649	2.5669	0	4.44492
40	114-endosp-12h	0	0	3.63312	3.11842	2.5872	5.12236	0	1.90602	2.76838	3.79048	0	1.91328	3.86962	3.67435	0	2.57682	0	4.81307	0	2.95198	0	3.99088	2.54739	0	2.19555	4.02932	0	2.50938	3.47928	2.27786	2.4991	2.37184	3.2212	3.9783	0	4.51826	2.60517	2.413	3.10756	0	5.691	3.93932	0	3.15951	0	0	0	5.09739
41	114-endosp-12h	0	3.05645	4.13289	3.68591	2.9947	5.02859	0	1.53914	2.84511	3.46779	0	2.15208	3.39933	3.32739	1.9966	2.62046	0	4.68003	2.11964	3.56986	3.11361	3.51275	2.53928	3.15083	1.71335	3.53272	0	2.5672	3.01451	1.57322	2.85162	1.94961	3.25315	3.4482	0	4.14848	2.72406	1.79784	3.15119	1.57083	5.02458	3.19182	1.86912	1.99154	2.44338	0	0	5.11457
42	114-endosp-12h	1.62513	2.96191	4.26018	3.12259	2.83816	5.21486	0	1.7023	2.66904	3.6156	2.38194	1.52098	3.56987	3.73011	1.61969	2.76774	0	4.71574	1.91796	2.77581	3.23456	3.8304	2.24849	3.16129	1.56456	3.30253	0	2.59857	2.97931	2.60882	2.73829	2.6712	3.07957	3.73554	1.87733	4.36695	2.81787	2.61349	3.25985	0	5.08799	3.35858	0	2.21006	2.02412	0	0	5.09325
43	114-endosp-12h	2.46347	2.65302	4.59701	3.00055	2.99125	5.16981	0	2.45713	2.66593	4.35915	2.40744	2.47924	4.02996	4.20071	0	2.95285	2.38578	4.78068	2.32326	2.57139	3.5134	4.82864	2.86764	3.60267	1.77809	3.45325	0	2.84426	3.12901	2.77748	0	2.80944	3.24064	4.20114	2.57502	4.52421	3.40733	2.52441	3.62059	2.67319	5.51844	3.71922	3.16079	2.92792	0	0	0	4.71229
45	114-endosp-12h	2.04822	2.61756	4.56613	3.19241	2.95254	5.23886	0	2.73022	2.94993	4.39021	2.16342	2.62968	4.10513	4.21059	1.7837	2.90871	1.86023	4.75317	2.39326	3.12133	3.88768	4.79236	2.76663	3.88027	0	3.55499	0	2.31687	3.15975	2.8527	2.89683	2.92389	3.47339	4.33998	2.7152	4.30433	2.89552	2.1444	3.6286	2.78649	5.18905	3.42022	2.87634	1.77476	2.31248	0	0	4.58516
51	114-endosp-24h	2.08573	3.37589	4.46621	3.02489	2.64649	4.98101	0	2.54835	2.82496	4.37302	2.50982	2.46926	3.8055	4.12446	1.7522	2.90784	2.27649	4.79718	2.20153	2.9776	4.06065	4.75895	2.87994	4.03641	2.19903	3.48122	0	2.87542	2.88742	3.23138	2.91046	2.81061	3.27138	4.08071	2.0987	4.52748	0	2.61709	3.69492	0	5.13493	3.25313	1.90263	2.03949	2.09609	0	0	4.77675
52	114-endosp-24h	1.5484	3.23263	4.23336	3.5427	3.11294	4.9564	0	0	2.91769	3.49928	1.89642	0	3.46071	3.54353	0	2.66881	0	4.70462	1.66179	3.43789	3.45712	3.3612	0	3.53342	2.0147	3.27744	0	2.38763	2.87393	2.33093	2.84991	2.28813	3.29947	3.39638	0	3.91033	1.90701	0	3.26243	2.03385	4.91984	3.13418	0	0	1.78268	0	0	5.15634
53	114-endosp-24h	0	2.92343	4.41696	3.12715	2.85669	5.25699	0	2.55754	2.8902	4.46935	2.6166	2.08866	3.99752	4.12565	1.84787	2.9792	2.49216	4.78442	2.01308	3.11746	3.89221	4.85617	2.69411	3.91285	0	3.51814	0	2.6381	3.00643	2.86692	2.91916	2.64799	3.37261	4.16241	2.54919	4.46858	3.11729	2.56963	3.64428	0	5.19263	3.29591	0	0	2.05712	0	0	4.89412
54	114-endosp-24h	0	2.0711	4.10083	3.44548	2.95768	5.23281	0	0	2.86181	3.91977	2.24115	2.04245	3.70398	3.84952	0	2.77489	1.84636	4.68682	2.67668	3.33598	3.45724	4.45404	2.12806	3.55661	0	3.36276	0	2.59081	2.89872	2.68887	2.94361	2.25097	3.3724	3.69945	0	4.27777	2.26237	1.85091	3.70317	0	5.03222	3.20526	1.97383	2.63164	1.78739	0	0	4.79961
55	Bd21-endosp-4h	3.04632	2.38265	4.49003	3.09896	2.55047	5.70681	0	2.02223	2.73327	4.65193	3.29188	2.72842	4.15339	4.45204	1.83778	3.21744	2.59338	4.89664	0	2.97419	2.48663	5.2642	3.01485	0	0	3.53061	0	2.98915	2.79627	2.95704	2.77759	3.00818	3.18378	4.52981	2.4308	4.70385	2.90693	2.5738	3.94562	1.85615	5.11096	3.21912	0	0	3.745	0	0	4.37157
56	114-endosp-24h	2.51047	2.54315	4.49196	3.15362	2.82864	5.11818	0	2.38159	2.76159	4.60485	2.5512	2.61298	4.00353	4.34098	1.85681	3.09644	2.47141	4.88279	0	2.58005	3.87558	4.90441	2.72755	3.82766	2.22442	3.38183	0	2.94586	2.85827	3.10868	2.64545	2.87411	3.23729	4.12807	0	4.60093	3.06253	2.67266	3.75607	2.52374	5.40124	3.59539	2.37878	2.50031	2.53685	0	0	4.90328
61	113-endosp-4h	2.72613	1.96067	4.88281	3.19718	3.30089	5.41288	0	3.23879	2.72097	5.30872	2.60338	3.30632	4.86928	4.7792	2.65168	3.04125	2.89612	5.06901	2.52527	2.89734	3.19063	5.37671	3.14137	3.08686	2.76069	3.18032	0	2.55062	2.5186	3.20549	0	2.91091	3.31077	4.86555	2.84171	4.75278	3.49861	2.9445	3.91525	2.49805	5.43498	3.59573	4.02582	2.66463	3.12489	2.7436	0	4.59121
62	113-endosp-4h	2.03833	2.36833	4.14393	3.37556	3.04217	5.44534	1.7218	1.85184	2.87428	4.46064	1.85861	1.80934	4.12554	4.06397	0	2.77845	2.18812	4.77819	0	3.27265	3.005	4.63622	2.52916	2.99159	0	3.35912	0	2.32009	2.85597	2.61114	2.55059	2.31869	3.33626	4.15	2.57843	4.23512	2.45842	1.94426	3.4425	1.97392	5.07057	3.21526	2.31335	1.95819	2.74652	0	0	5.03048
63	113-endosp-4h	2.61525	2.5637	4.27791	3.14092	2.9795	5.42877	1.65266	2.61709	2.67892	4.88118	1.85184	2.99667	4.4764	4.33312	0	2.75081	2.43572	4.85033	2.41864	2.92455	3.08219	5.09784	2.87165	3.21856	2.01446	3.39889	0	2.6312	2.86962	2.52939	2.68053	2.02631	2.92575	4.60527	2.96004	4.52687	3.16602	2.73698	3.54517	2.1726	5.18592	3.34308	2.85703	2.19842	2.72121	0	0	4.71719
64	113-endosp-4h	2.86212	2.02228	4.73224	3.33332	3.17558	5.4387	0	2.91825	2.92863	5.09379	2.36469	3.20695	4.64289	4.58217	2.24278	3.14679	2.7989	5.01471	3.02818	3.31954	3.33951	5.31596	2.84358	3.38519	2.20734	3.63385	0	2.7772	3.1005	3.69234	2.9906	2.87565	3.34329	4.72584	2.80727	4.7145	3.51645	2.86102	4.16153	2.49706	5.32874	3.50566	3.86364	2.767	2.09845	2.0003	0	4.5435
65	Bd21-endosp-4h	3.40733	2.66257	4.80531	3.02949	2.82592	4.97596	0	2.48361	2.79908	3.85168	3.38681	2.29902	3.99165	5.16532	1.99095	3.63766	3.25645	5.18172	2.19111	2.66043	2.25701	4.97166	3.43687	2.68777	0	3.32463	0	2.99688	2.67006	2.68044	0	3.27158	3.23854	4.46674	2.89836	4.66999	3.57684	2.56976	4.2625	2.6937	5.19427	3.34848	2.97546	2.24954	4.04773	0	0	4.71279
66	113-endosp-4h	2.43039	2.44418	4.55014	3.29935	3.25753	5.586	1.65735	2.53847	2.90804	4.98635	2.37822	2.98624	4.61268	4.47481	2.17884	3.08718	2.61936	4.95637	2.74907	3.01972	3.13115	5.20471	3.06761	3.10603	1.82567	3.34609	0	2.43751	2.82716	2.93071	2.93328	2.54707	3.27894	4.6181	2.96426	4.50061	3.19721	2.38725	3.67697	2.61035	5.25559	3.24134	3.74761	2.44487	2.85425	2.48365	0	4.6607
72	113-endosp-12h	2.33868	2.70782	4.04141	3.16507	2.7538	5.43045	0	0	2.87577	4.1738	2.1776	2.23268	3.80068	4.08622	1.86907	2.7148	0	4.84864	0	2.9081	3.4583	4.67862	2.71143	3.50468	1.89456	3.50384	0	2.44105	2.94239	2.58085	2.58117	2.33442	3.2329	4.09196	0	4.47796	3.23289	2.3498	3.48719	0	5.14682	3.23456	0	2.64852	1.95876	0	0	5.08539
73	113-endosp-12h	1.7438	0	4.59883	3.32491	3.14879	5.32744	0	0	3.07125	3.9967	2.25596	2.08423	3.66094	3.97252	0	2.8137	0	4.84601	2.03508	3.13234	3.34826	4.54183	2.97106	3.37156	2.11963	3.59352	0	2.52666	2.92328	2.71038	2.81201	2.8017	3.40483	3.89584	2.15209	4.03239	2.8738	2.11655	3.46629	2.51908	5.1087	3.24171	2.32811	2.54478	2.46459	0	0	5.01976
74	113-endosp-12h	2.44185	2.70881	4.18391	3.22413	2.83718	5.31415	0	1.76882	2.79006	3.99924	2.12213	1.83141	3.78532	4.02393	0	2.6448	0	4.80853	1.70647	3.04504	3.38167	4.58979	2.76122	3.43406	0	3.36572	0	2.69488	2.9544	2.79403	0	2.68937	3.37807	3.91295	2.12578	4.44426	2.83307	2.36222	3.35153	1.88732	5.10954	3.30061	2.23193	1.93787	2.07126	0	0	5.04394
75	113-endosp-12h	1.75569	1.82368	4.60121	3.3829	2.90768	5.37547	0	0	2.96965	4.17942	1.7992	1.97929	3.79954	4.14687	0	2.61558	2.02734	4.82493	2.35122	3.26997	3.56624	4.76166	2.93197	3.66993	2.3175	3.49792	0	2.66808	2.8489	2.88339	2.8733	2.77937	3.36879	3.94663	2.15812	4.25591	3.04592	2.40078	3.49602	2.10042	5.15905	3.32453	0	2.28481	2.64629	0	0	4.91527
76	Bd21-endosp-4h	3.108	2.36566	4.70721	2.55431	2.84569	5.74557	0	2.70118	2.41669	4.72731	2.99811	2.72747	4.19891	4.49419	0	3.3335	2.91652	4.89773	2.62896	2.06433	2.44672	5.43591	3.27051	2.7425	2.88909	3.22373	1.66511	2.79798	2.55396	3.01475	2.58879	3.06237	3.04833	4.70902	2.92924	4.76215	2.84832	2.83024	4.1601	2.96777	5.17469	3.20718	3.79958	2.503	4.26531	2.4973	0	4.32479
77	113-endosp-12h	1.91086	1.96777	4.4276	3.30055	2.97137	5.27971	0	1.62257	3.05548	4.31192	1.81585	2.32191	3.96572	4.16661	0	3.02092	0	4.86207	1.66114	3.01776	3.43782	4.91045	2.97038	3.50985	2.05231	3.74354	0	2.73054	3.11987	2.81874	3.04219	2.77398	3.57178	4.13008	2.50384	4.36433	2.63525	2.49229	3.6961	2.46745	5.38075	3.5982	3.14186	2.68395	2.65999	1.92547	0	4.87534
83	113-endosp-24h	1.64201	4.76562	4.38555	2.95507	2.89319	5.27698	0	2.10869	2.7317	4.25223	2.48324	2.43237	3.80269	4.08637	0	3.26875	2.08496	4.84093	2.01575	2.95026	3.24042	4.94049	2.47092	3.16817	1.90655	4.52543	0	2.80683	2.82841	2.96215	2.87878	2.01598	3.26654	3.99018	1.9045	4.56059	3.08864	2.5227	3.91388	0	5.12095	3.32014	2.21554	2.26318	0	0	0	4.90832
84	113-endosp-24h	0	2.86736	4.0259	3.27896	2.84055	4.99356	0	1.72149	2.84568	3.58619	2.1207	0	3.44764	3.56016	0	2.76154	0	4.63654	2.23165	3.05382	2.91989	4.05947	2.41301	3.13919	0	3.26531	0	2.5833	2.87294	2.72893	2.87243	2.22418	3.21987	3.52765	1.77367	4.31961	2.98274	1.86895	3.38165	0	5.01565	3.21309	1.87036	2.40092	0	0	0	5.10989
85	113-endosp-24h	2.68164	5.19727	4.70882	2.88401	2.8741	5.17171	0	2.35902	2.80897	4.67459	2.84741	2.87157	4.0785	4.45724	0	3.52322	2.59552	5.04366	0	2.57904	3.23295	5.27153	3.35734	3.29086	2.24527	4.79569	0	2.97606	3.0719	3.36505	2.41957	2.77231	3.22259	4.46675	2.68329	4.82323	2.99658	2.89468	4.27152	3.34959	5.3604	3.41203	3.82511	2.70704	2.27034	1.89322	0	4.4787
86	113-endosp-24h	2.25711	3.87249	4.55663	3.32793	2.99905	5.21927	1.58717	2.37492	2.92415	4.33221	2.58436	2.46887	3.85208	4.2883	0	3.27488	2.04441	4.82016	2.14881	3.04893	3.33299	4.98681	2.83207	3.35913	1.81355	3.5933	0	2.62979	3.01827	3.16031	2.37578	2.57702	3.32726	4.1991	1.98277	4.39169	3.2385	2.31303	4.18515	2.46217	5.20457	3.36754	3.23861	2.47901	2.39313	2.06289	0	4.63229
87	Bd21-endosp-4h	3.15767	2.74351	4.89515	2.78804	2.50227	5.1906	1.77991	1.99179	2.71744	4.0496	3.31166	2.30847	3.89193	4.63322	0	3.38571	2.57445	5.02738	1.89937	2.65378	2.67953	5.00161	3.32116	2.76673	2.02761	3.36019	0	2.59277	2.50326	2.72317	2.58488	3.1298	3.13345	4.11248	2.12129	4.60449	3.59006	2.76661	3.97618	2.80663	5.31254	3.38657	1.99758	2.50865	3.67072	0	0	4.9119
88	113-endosp-24h	2.2799	3.06581	4.50145	2.9445	2.96304	5.25024	0	0	2.86726	4.56892	2.69337	2.35047	4.07287	4.29131	0	3.28372	2.00503	4.83767	2.02402	2.66653	3.4022	5.16527	2.94576	3.39969	2.08692	3.28734	0	2.69035	2.72944	3.24796	0	2.82518	3.33041	4.31795	2.33327	4.49699	3.06859	1.81799	4.12085	2.3777	5.12419	3.1904	3.22748	0	2.25818	2.2423	0	4.53928
Bd21 - B. distachyon (Bd)
114 - B. stacei (Bs)
113 - B. hybridum (BdBs)
[truncated: 2,318 more columns]
